# Supplementary material for: FtsK Initiates the Assembly of a Unique Divisome Complex in the FtsZ-less Chlamydia trachomatis
Source: PubMed Central journal article supplement (PMC11527202; doi:10.1101/2024.10.24.620021), 2024-10-24
Supplement: NIHPP2024.10.24.620021v1-supplement-1.pdf [file NIHPP2024.10.24.620021v1-supplement-1.pdf]

830

831 **Supplemental Figure 1**

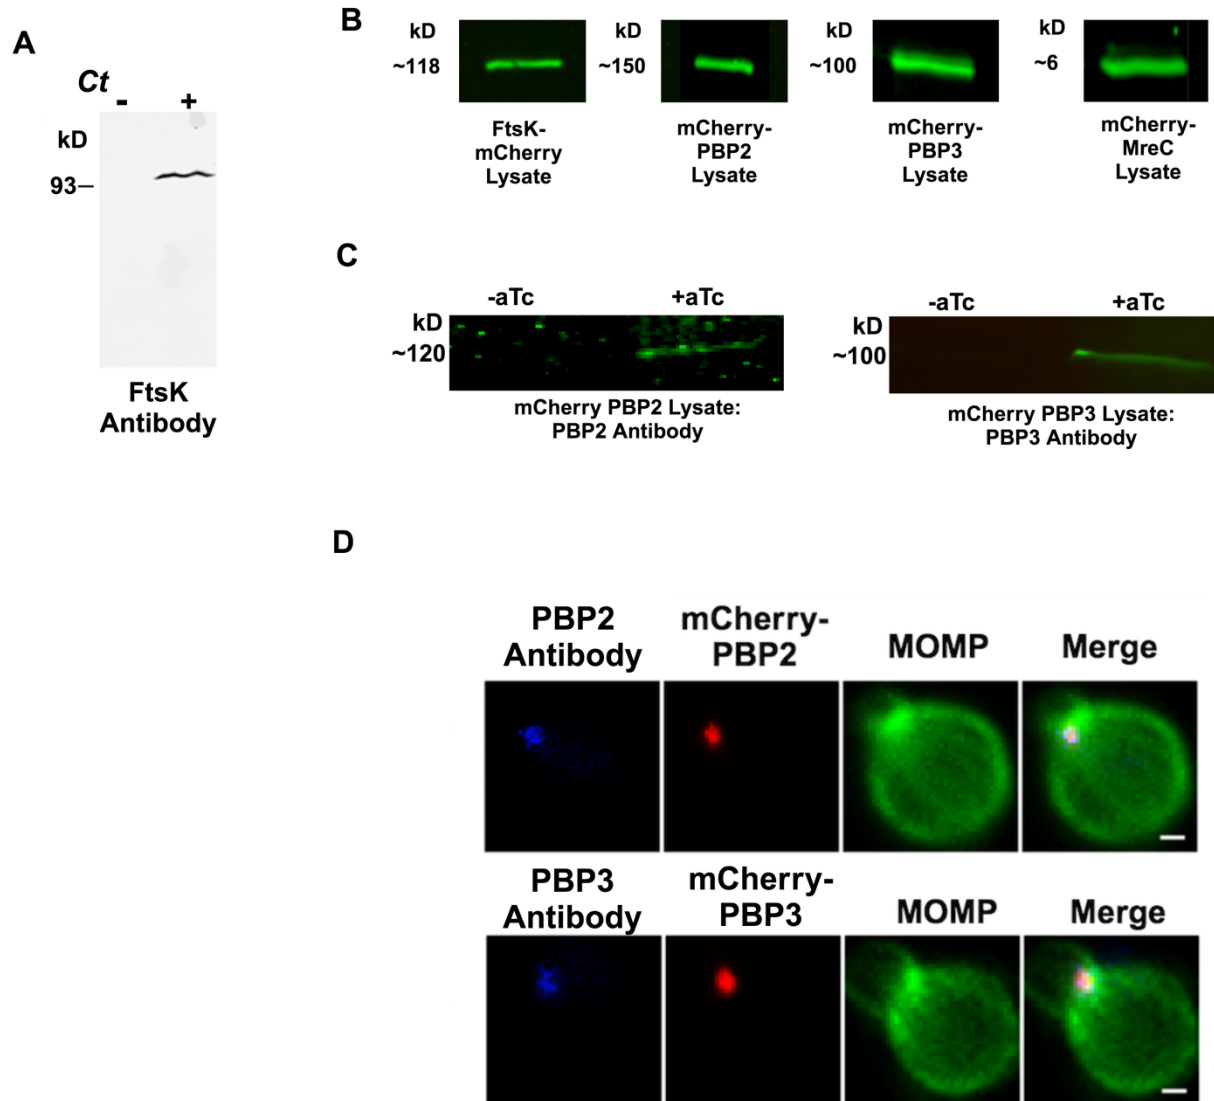

832

833

834

835 Supplemental Figure 2

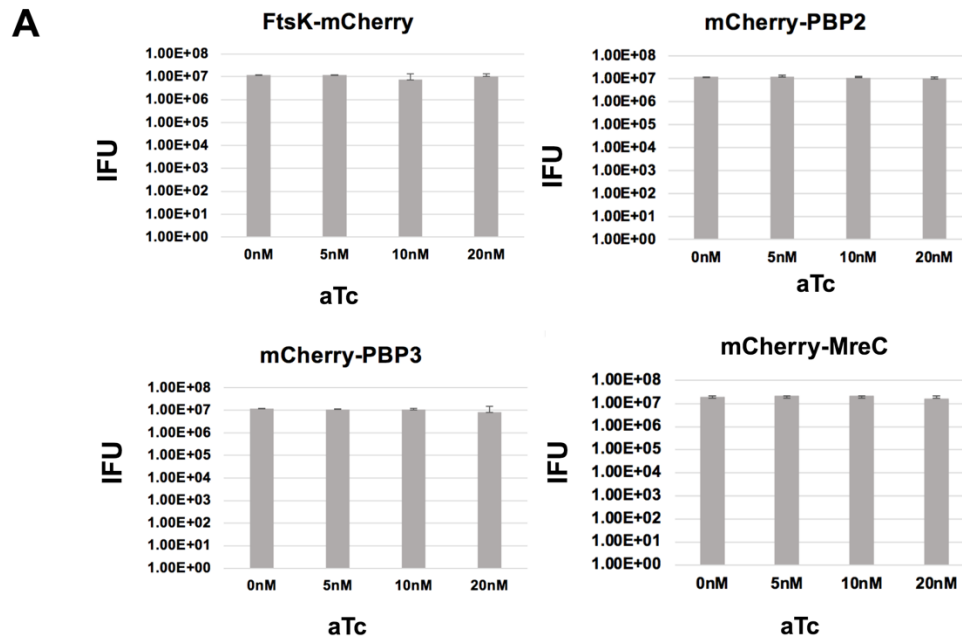

**B**

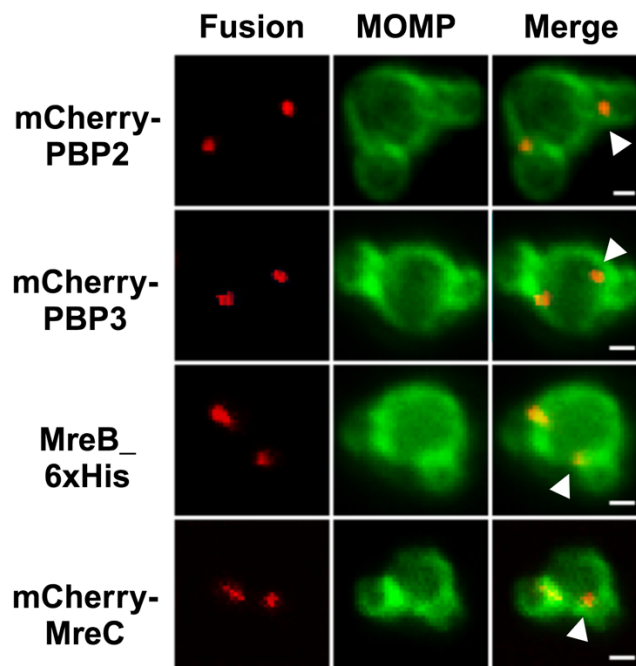

836

837

838 Supplemental Figure 3

**A**

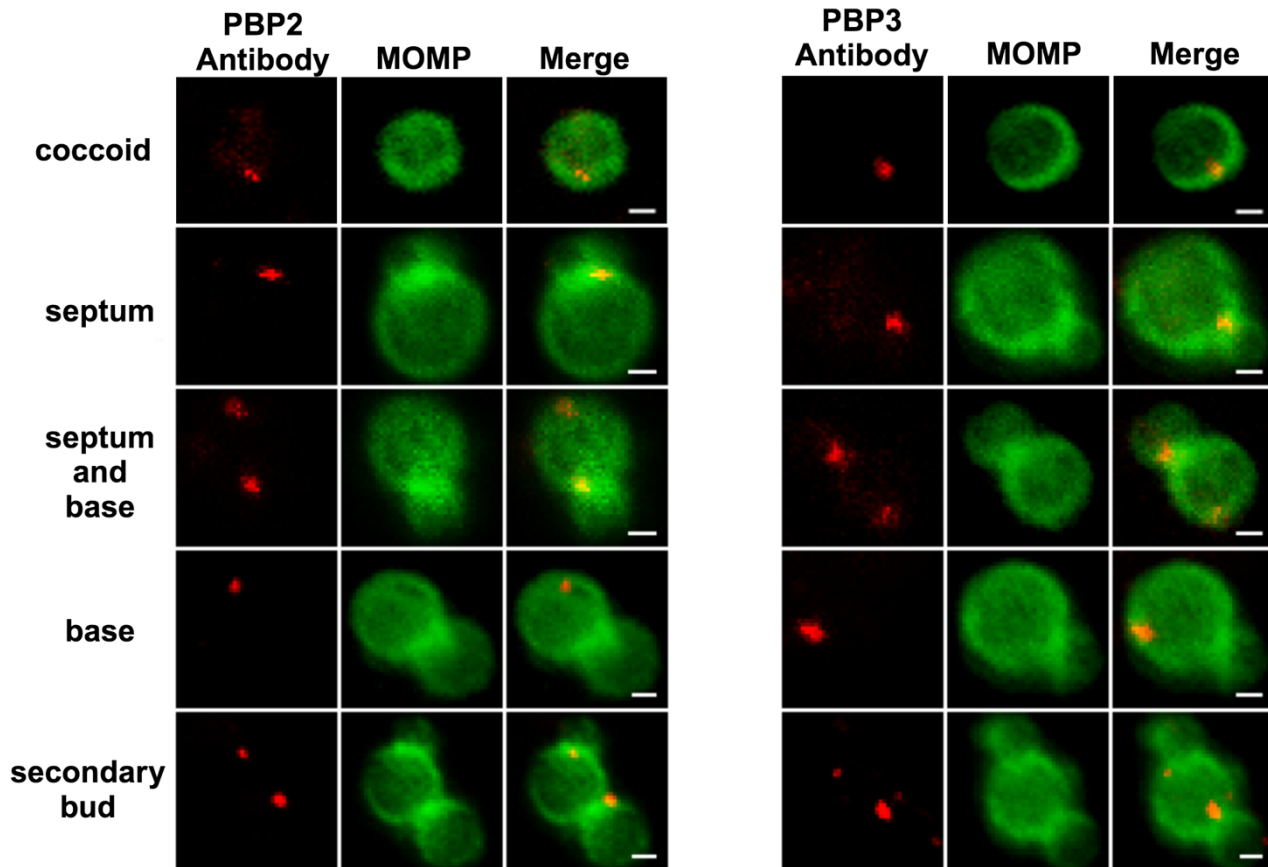

**B**

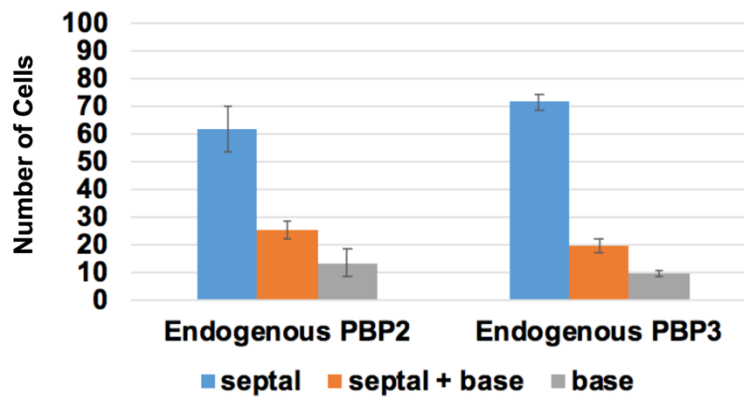

839 Supplemental Figure 4

A

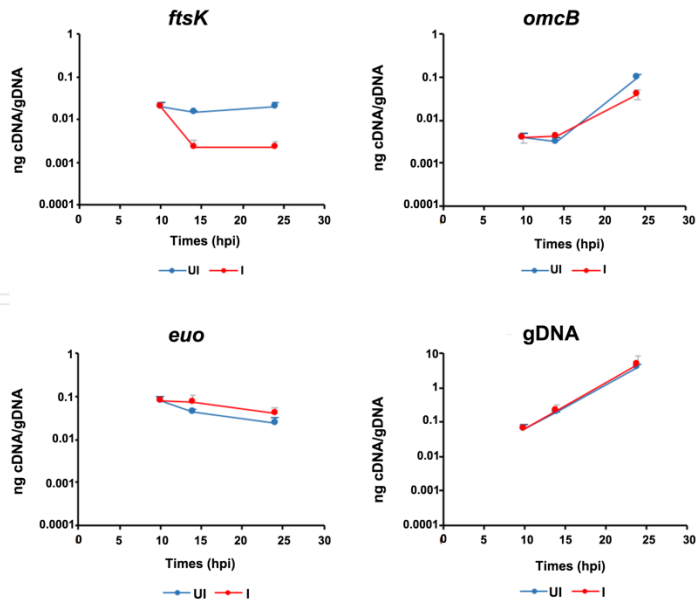

B

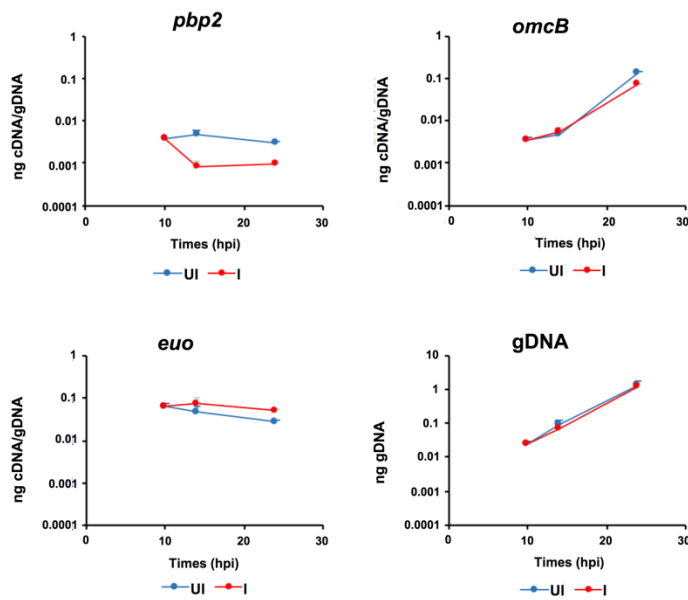

C

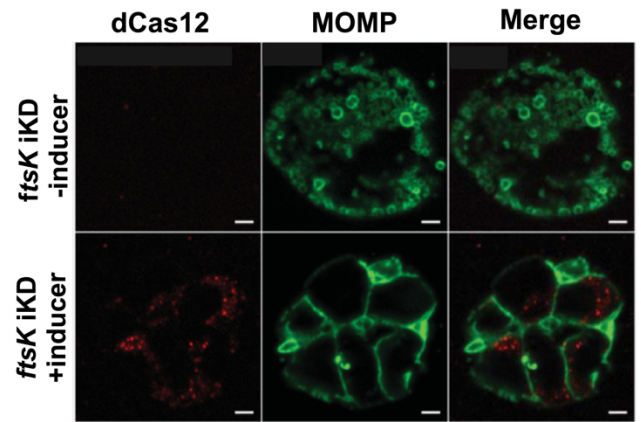

D

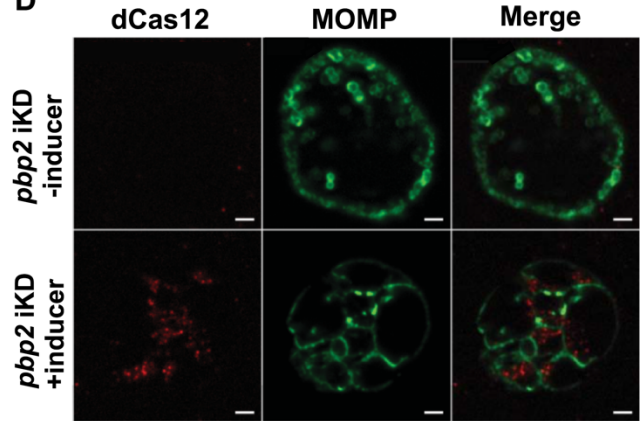

E

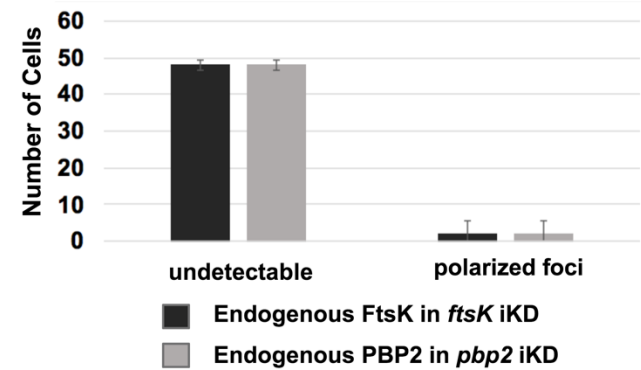

840

841

842 **Supplemental Figure 5**

**A**

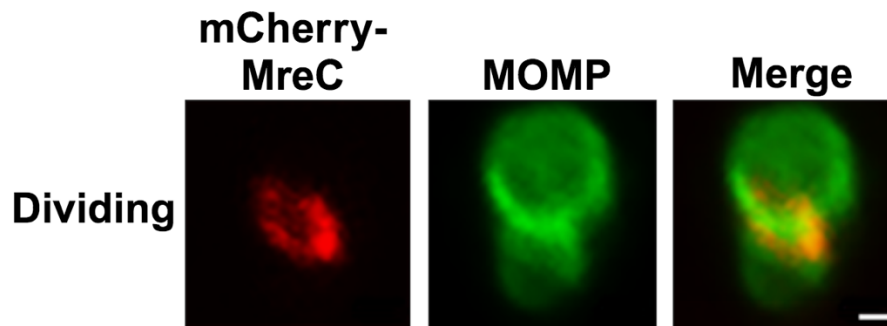

**B**

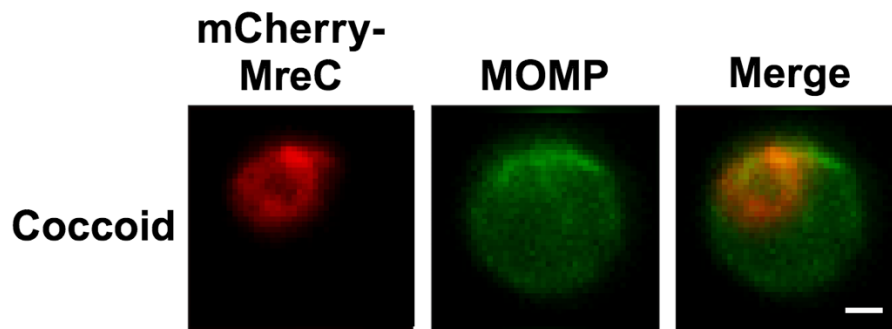

843

844

845

846

847 **Supplemental Table 1**

| <b>Primer Name</b>        | <b>Primer Sequence (5'-3')</b>                                    | <b>GC content (%)</b> | <b>TM (°C)</b> |
|---------------------------|-------------------------------------------------------------------|-----------------------|----------------|
| <b>FtsK_mCherry (fwd)</b> | <b>AGAGGAGAAAGGATCTGCGGCCGCATGGGAAAAGAACGGAAGAAAGCAAG</b>         | <b>52</b>             | <b>72.8</b>    |
| <b>FtsK_mCherry (rvs)</b> | <b>CCCTTAGAGACCATTGCGGCCGCATCGTCCTGATTTGATAATTGGACTAGTATTTGAC</b> | <b>47</b>             | <b>72.4</b>    |
| <b>mCherry_PBP2 (fwd)</b> | <b>ATGGTCTCTAAGGGCGAGGAAGAC</b>                                   | <b>54</b>             | <b>59.1</b>    |
| <b>mCherry_PBP2 (rvs)</b> | <b>ATGGTCGACCGGTACCCTTAGCTGAAAGATTTTTACGAATCTCTTCCCATTCTCTATC</b> | <b>41</b>             | <b>70.2</b>    |
| <b>mCherry_PBP3 (fwd)</b> | <b>ATGGTCTCTAAGGGCGAGGAAGAC</b>                                   | <b>54</b>             | <b>59.1</b>    |
| <b>mCherry_PBP3 (rvs)</b> | <b>ATGGTCGACCGGTACCCTATTTGCGATTCCATTCTCATATAGCAG</b>              | <b>48</b>             | <b>69.9</b>    |
| <b>mCherry_MreC (fwd)</b> | <b>ATGGTCTCTAAGGGCGAGGAAGAC</b>                                   | <b>54</b>             | <b>59.1</b>    |
| <b>mCherry_MreC (rvs)</b> | <b>ATGGTCGACCGGTACCCTACTCCCAAATCAAACCAAAAATATCAGGACG</b>          | <b>47</b>             | <b>70.4</b>    |
| <b>Plasmid</b>            | <b>pBOMB4-tet</b>                                                 |                       |                |

848

849

850

851

852

853

854

855

856

857

858 Supplemental Table 2

| <b>Primer Name</b> | <b>Primer Sequence (5'-3')</b> | <b>GC content (%)</b> | <b>T<sub>M</sub> (°C)</b> |
|--------------------|--------------------------------|-----------------------|---------------------------|
| <b>ftsK (fwd)</b>  | <b>CGACTCCAAGTTCCTCTTCTTC</b>  | <b>39.1</b>           | <b>55.2</b>               |
| <b>ftsK (rvs)</b>  | <b>GATCCAGTGGTTCCTGCAATA</b>   | <b>47.6</b>           | <b>54.6</b>               |
| <b>pbp2 (fwd)</b>  | <b>TAACACTGACGCGGAACATAG</b>   | <b>47.6</b>           | <b>55.1</b>               |
| <b>pbp2 (rvs)</b>  | <b>CCGAAAGCATGAGCAGATAGA</b>   | <b>47.6</b>           | <b>54.8</b>               |
| <b>omcB (fwd)</b>  | <b>CGGTAGGATCTCCCTATCCTATT</b> | <b>47.8</b>           | <b>54.4</b>               |
| <b>omcB (rvs)</b>  | <b>CGAACTCTGCTTCACATGGTA</b>   | <b>47.6</b>           | <b>55</b>                 |
| <b>euo (fwd)</b>   | <b>CGAAGACTACTCGTTGGGAAATA</b> | <b>43.5</b>           | <b>54.7</b>               |
| <b>euo (rvs)</b>   | <b>AACAGAAGCTCTCCTTGATAAGT</b> | <b>39.1</b>           | <b>53.8</b>               |

859

860
